# Supplementary material
Source: PubMed Central journal article supplement (PMC6788970)
Supplement: NIHMS1537156-supplement-1.pdf [file NIHMS1537156-supplement-1.pdf]

# Hypertension screening and care algorithm

## Dispensary care algorithm:

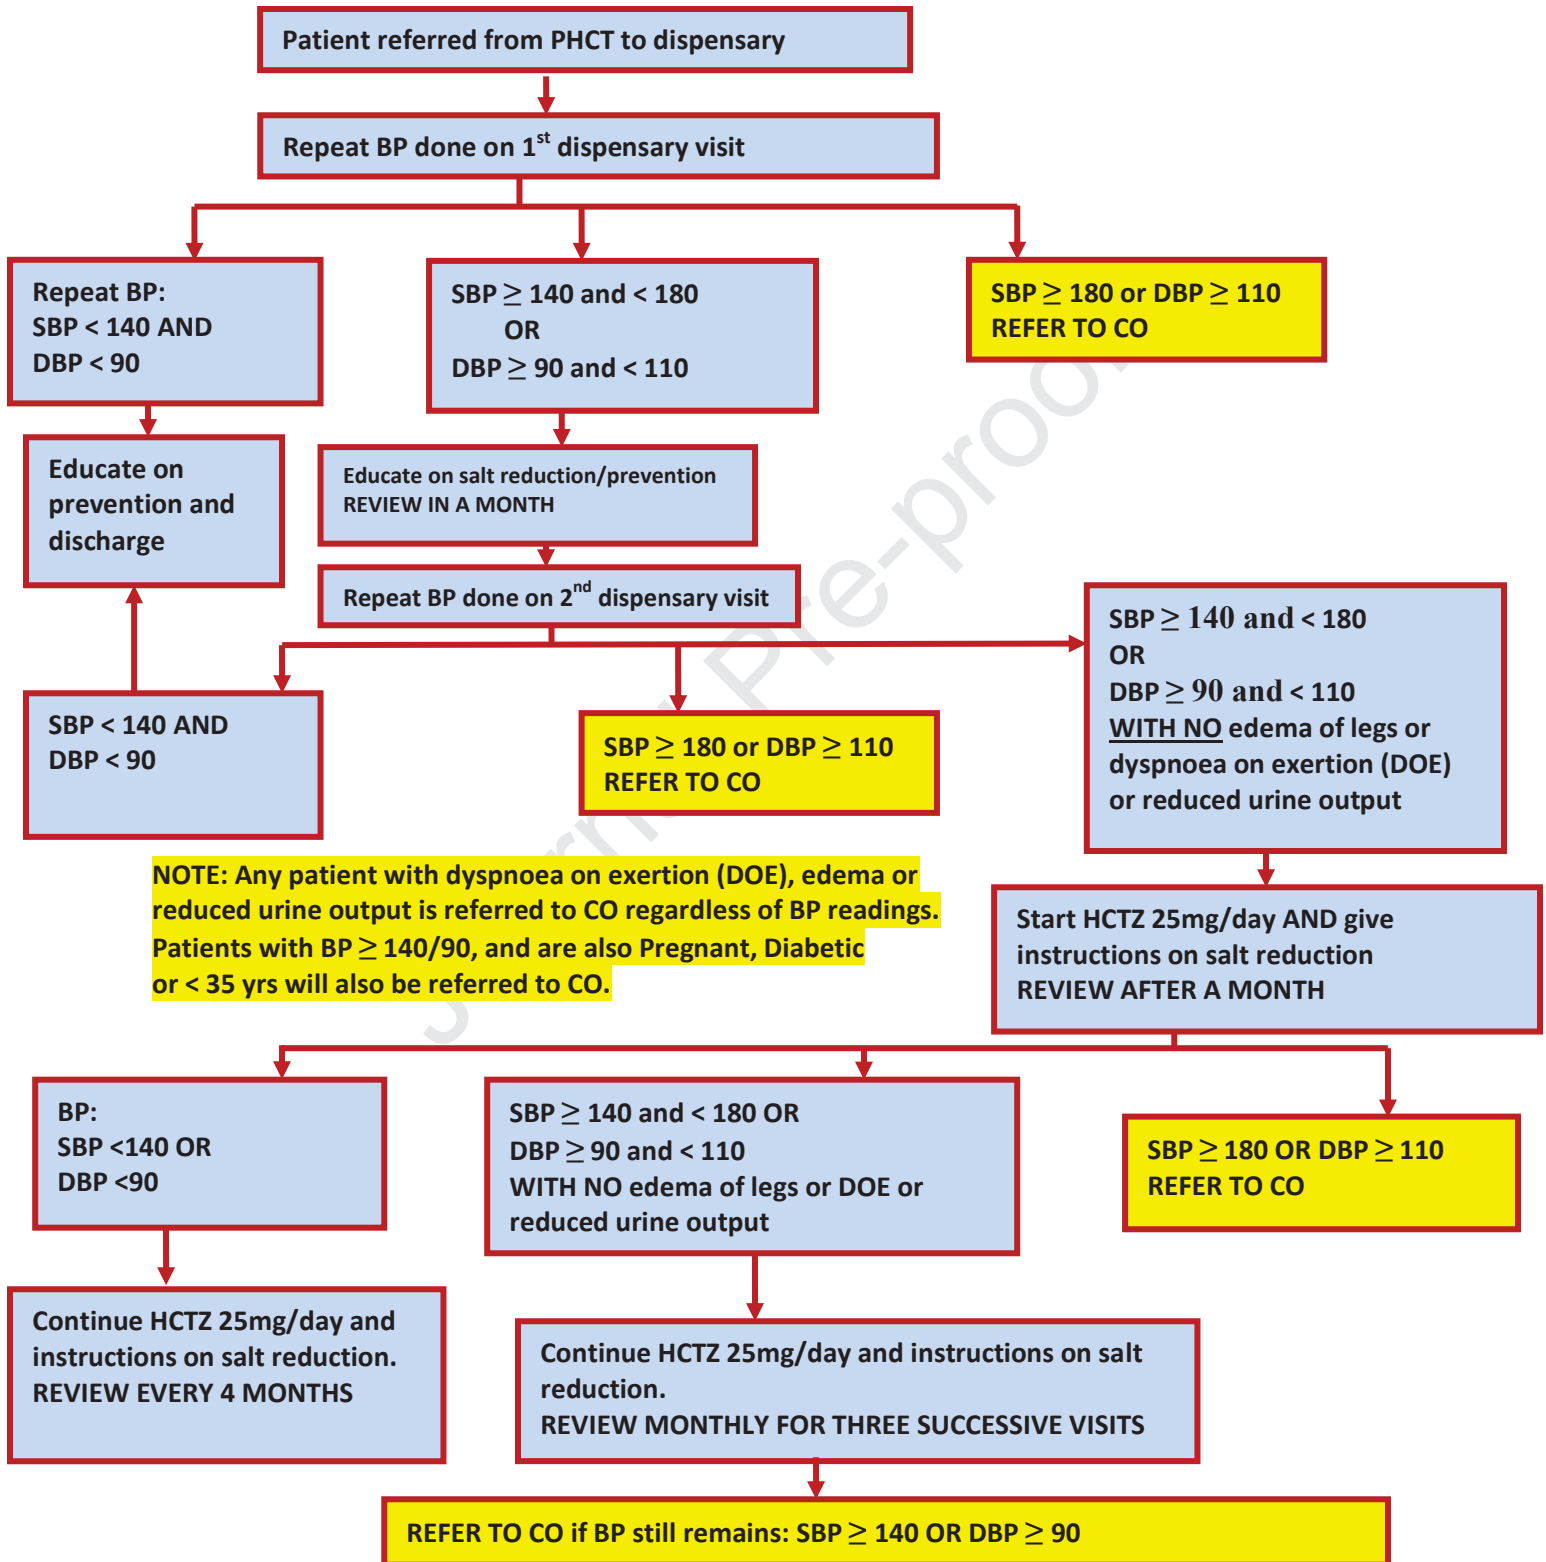

## Health center Hypertension (HTN) care algorithm (Htn Algorithm 2)

### Entry criteria:

- 1) Stage 2 HTN or BP > 180/110 confirmed at dispensary/triage area
- 2) HTN uncontrolled at dispensary with Rx
- 3) HTN with symptoms of end organ damage
- 4) HTN with Diabetes
- 5) HTN in patient <30years

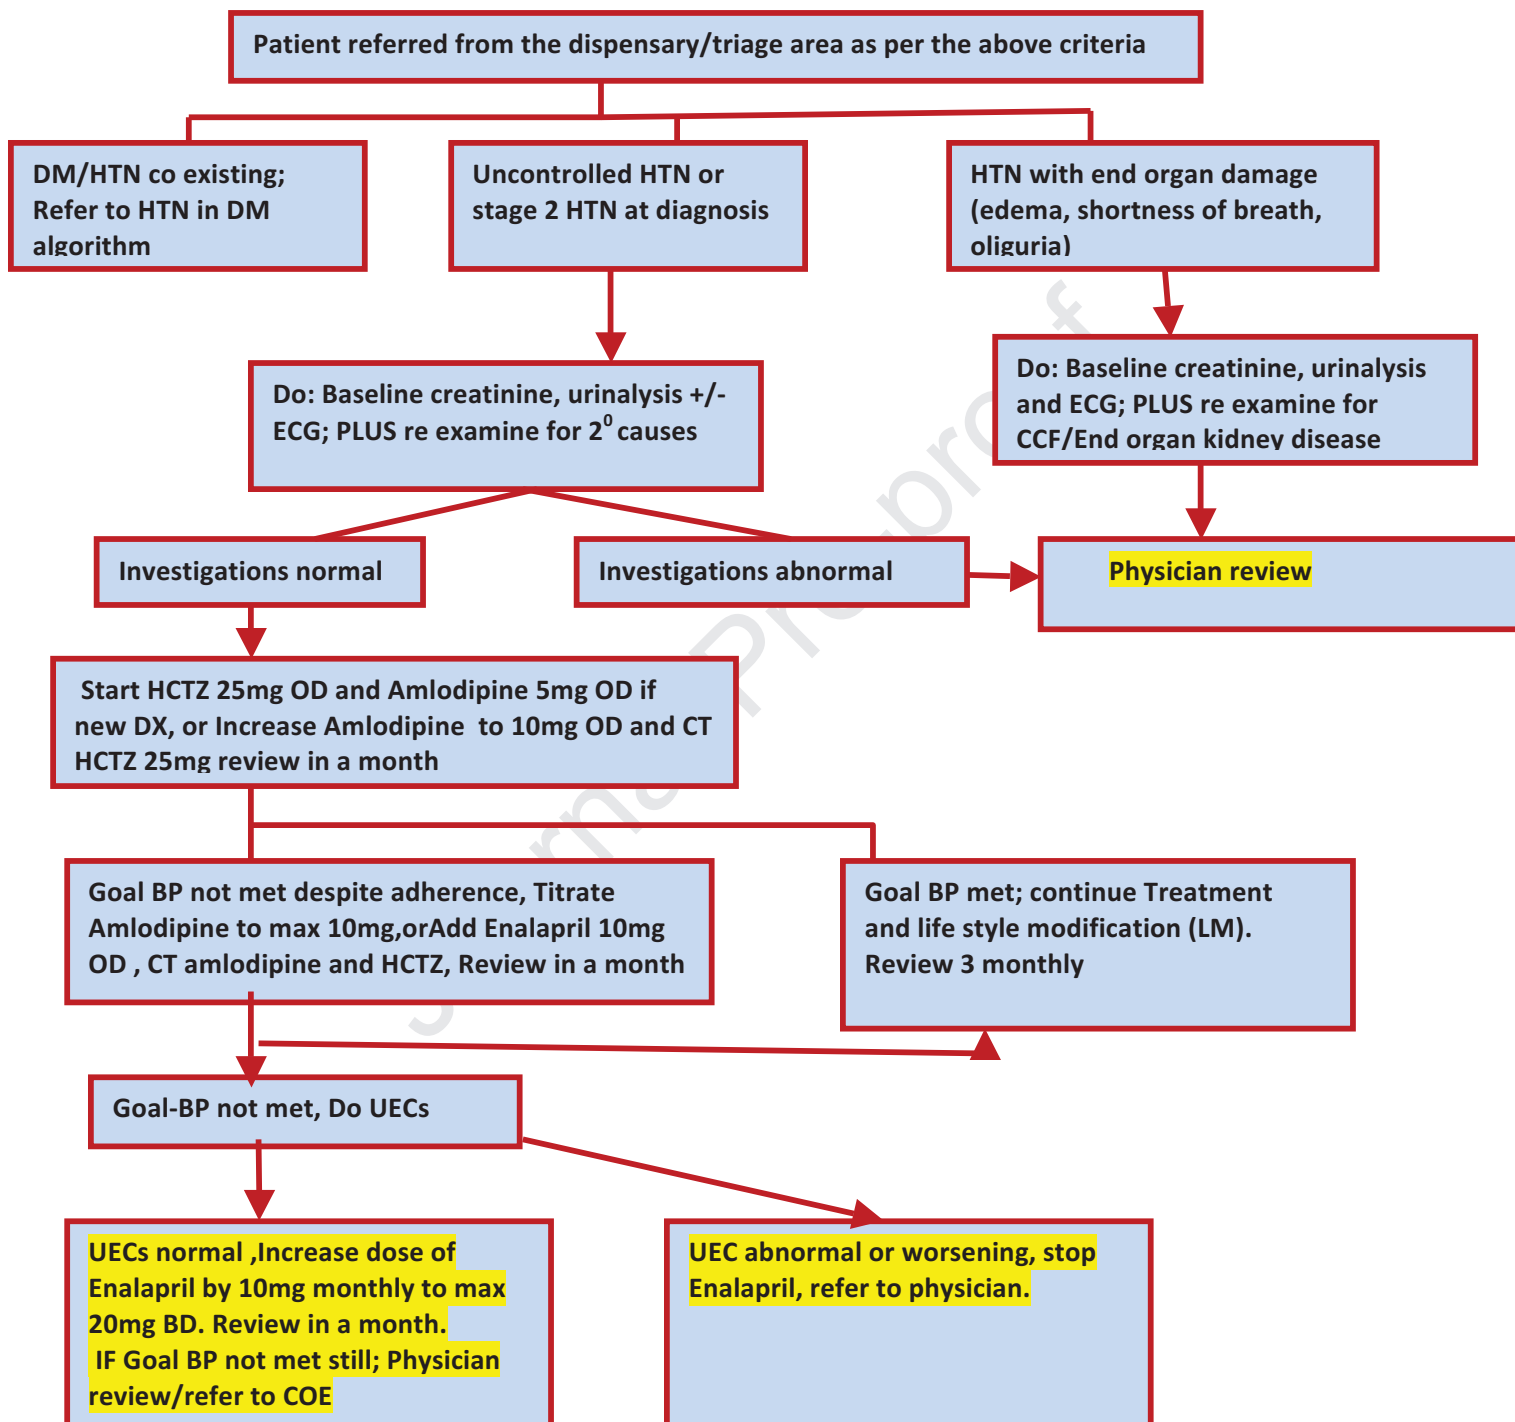

## Management of hypertension in diabetes

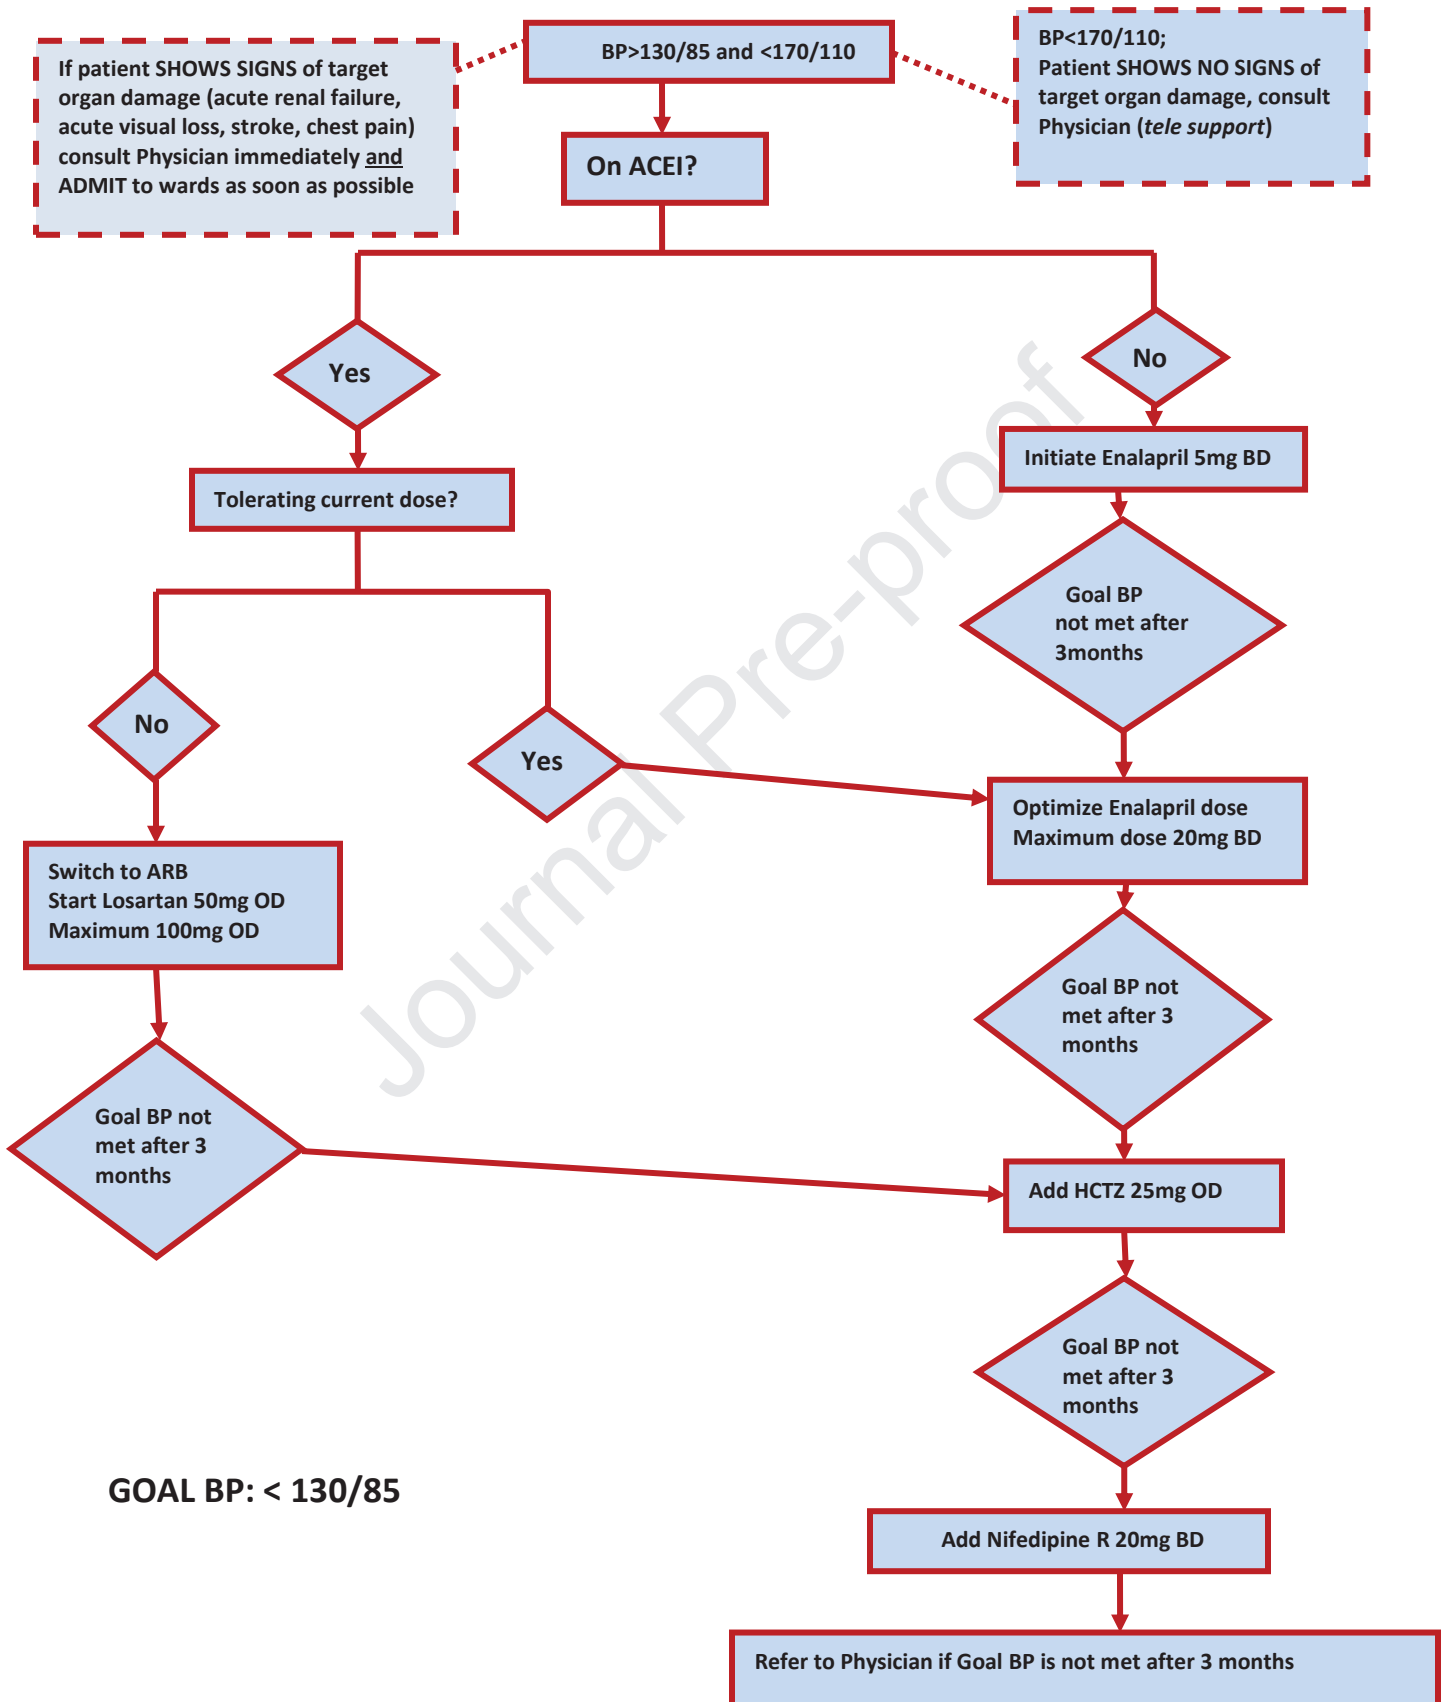

**Supplemental Tables**

**Supplemental Table 1.** Additional covariates for LARK participants. CHW = community health worker; HCT = home-based counseling and testing.

| Variable name                            | value                                 | Total<br>(n=1460) | Usual<br>Care<br>(n=491) | Paper<br>Based<br>(n=500) | Smart<br>Phone<br>(n=469) |
|------------------------------------------|---------------------------------------|-------------------|--------------------------|---------------------------|---------------------------|
| Enrollment Strategy                      |                                       |                   |                          |                           |                           |
|                                          | Baraza                                | 1370<br>(94)      | 469<br>(96)              | 449<br>(90)               | 452<br>(96)               |
|                                          | Newly identified HCT                  | 7 (0)             | 2 (0)                    | 5 (1)                     | 0 (0)                     |
|                                          | Previously identified<br>not linked   | 29 (2)            | 7 (1)                    | 17 (3)                    | 5 (1)                     |
|                                          | Previously identified<br>not retained | 11 (1)            | 1 (0)                    | 8 (2)                     | 2 (0)                     |
|                                          | Health Facility                       | 37 (3)            | 11 (2)                   | 17 (3)                    | 9 (2)                     |
|                                          | Identified by CHW                     | 6 (0)             | 1 (0)                    | 4 (1)                     | 1 (0)                     |
| Aware of hypertensive<br>status          |                                       |                   |                          |                           |                           |
|                                          | Missing                               | 27 (2)            | 12 (2)                   | 11 (2)                    | 4 (1)                     |
|                                          | No                                    | 842 (58)          | 259<br>(53)              | 280<br>(56)               | 303<br>(65)               |
|                                          | Yes                                   | 591 (40)          | 220<br>(45)              | 209<br>(42)               | 162<br>(35)               |
| Type of tobacco used                     |                                       |                   |                          |                           |                           |
|                                          | Chew                                  | 45 (40)           | 9 (39)                   | 15 (35)                   | 21 (45)                   |
|                                          | Cigarettes                            | 53 (47)           | 10 (43)                  | 24 (56)                   | 19 (40)                   |
|                                          | Pipe                                  | 1 (1)             | 0 (0)                    | 0 (0)                     | 1 (2)                     |
|                                          | Sniff                                 | 14 (12)           | 4 (17)                   | 4 (9)                     | 6 (13)                    |
| Servings of alcohol<br>consumed per week |                                       |                   |                          |                           |                           |
|                                          | <5                                    | 124 (64)          | 26 (67)                  | 52 (60)                   | 46 (68)                   |
|                                          | 6-10                                  | 44 (23)           | 10 (26)                  | 19 (22)                   | 15 (22)                   |
|                                          | 11-15                                 | 13 (7)            | 1 (3)                    | 8 (9)                     | 4 (6)                     |
|                                          | Missing                               | 12 (6)            | 2 (5)                    | 7 (8)                     | 3 (4)                     |

**Supplemental Table 2.** Additional outcome measures for LARK participants. AMRS = AMPATH Medical Records System; BP = blood pressure; CDM = Chronic Disease Program; DBP = diastolic blood pressure; SBP = systolic blood pressure.

| Variable Name                                      | value                     | Total        | Usual Care  | Paper Based | Smartphone |
|----------------------------------------------------|---------------------------|--------------|-------------|-------------|------------|
| Link to CDM in 1 year among those with Information |                           |              |             |             |            |
|                                                    | No                        | 1048<br>(83) | 312<br>(76) | 385<br>(86) | 351 (86)   |
|                                                    | Yes                       | 219<br>(17)  | 100<br>(24) | 63 (14)     | 56 (14)    |
| Link to CDM ever                                   |                           |              |             |             |            |
|                                                    | No                        | 1010<br>(69) | 291<br>(59) | 375<br>(75) | 344 (73)   |
|                                                    | Yes                       | 257<br>(18)  | 121<br>(25) | 73 (15)     | 63 (13)    |
|                                                    | Unable to capture in AMRS | 193<br>(13)  | 79 (16)     | 52 (10)     | 62 (13)    |
| Link to CDM ever among those with Information      |                           |              |             |             |            |
|                                                    | No                        | 1010<br>(80) | 291<br>(71) | 375<br>(84) | 344 (85)   |
|                                                    | Yes                       | 257<br>(20)  | 121<br>(29) | 73 (16)     | 63 (15)    |
| Link Per Tracker                                   |                           |              |             |             |            |
|                                                    | No                        | 663<br>(45)  | 197<br>(40) | 270<br>(54) | 196 (42)   |
|                                                    | Yes                       | 465<br>(32)  | 165<br>(34) | 133<br>(27) | 167 (36)   |
|                                                    | Unable to Ascertain       | 332<br>(23)  | 129<br>(26) | 97 (19)     | 106 (23)   |
| Link Per Tracker among those with Information      |                           |              |             |             |            |
|                                                    | No                        | 663          | 197         | 270         | 196 (54)   |

|                                                      |                                                  |                 |                 |                 |              |
|------------------------------------------------------|--------------------------------------------------|-----------------|-----------------|-----------------|--------------|
|                                                      |                                                  | (59)            | (54)            | (67)            |              |
|                                                      | Yes                                              | 465<br>(41)     | 165<br>(46)     | 133<br>(33)     | 167 (46)     |
| Linkage Overall among those with Information         |                                                  |                 |                 |                 |              |
|                                                      | No                                               | 414<br>(37)     | 117<br>(32)     | 186<br>(46)     | 111 (31)     |
|                                                      | Yes                                              | 714<br>(63)     | 245<br>(68)     | 217<br>(54)     | 252 (69)     |
| Follow up and BP Category                            |                                                  |                 |                 |                 |              |
|                                                      | Have Follow-Up and BP Change Information         | 1009<br>(69)    | 303<br>(62)     | 353<br>(71)     | 353 (75)     |
|                                                      | Have Follow-Up but BP Change Information Missing | 97 (7)          | 52 (11)         | 42 (8)          | 3 (1)        |
|                                                      | No Follow-Up                                     | 354<br>(24)     | 136<br>(28)     | 105<br>(21)     | 113 (24)     |
| Enrollment diastolic BP among those with follow up   |                                                  |                 |                 |                 |              |
|                                                      |                                                  | 90.1<br>(12.0)  | 90.0<br>(12.2)  | 90.4<br>(12.1)  | 89.9 (11.7)  |
|                                                      | Missing                                          | 451             | 188             | 147             | 116          |
|                                                      |                                                  |                 |                 |                 |              |
|                                                      |                                                  |                 |                 |                 |              |
| Follow up diastolic BP among those with Baseline DBP |                                                  |                 |                 |                 |              |
|                                                      |                                                  | 90.8<br>(13.5)  | 90.1<br>(13.8)  | 90.8<br>(14.0)  | 91.3 (12.7)  |
|                                                      | Missing                                          | 451             | 188             | 147             | 116          |
| Follow up systolic BP among those with Baseline SBP  |                                                  |                 |                 |                 |              |
|                                                      |                                                  | 149.6<br>(21.5) | 149.7<br>(22.6) | 149.8<br>(21.1) | 149.3 (20.9) |
|                                                      | Missing                                          | 451             | 188             | 147             | 116          |
